# Supplementary material for: Fabrication of rutile TiO2 nanorod arrays on a copper substrate for high-performance lithium-ion batteries
Source: Royal Society of Chemistry journal article supplement (doi:10.1039/c6ra10285a), 2016-01-01
Supplement: c6ra10285a1.pdf [file c6ra10285a1.pdf]

## Supporting Information

# Fabrication of Rutile TiO<sub>2</sub> Nanorods Arrays on Copper Substrate for High-performance Lithium-ion Batteries

Guanrao Liu, Shichao Zhang\*, Xiaomeng Wu, and Ruoxu Lin

*School of Materials Science and Engineering, Beijing University of Aeronautics and Astronautics, Beijing 100191, China*

### Structural characterization of TiO<sub>2</sub> arrays

X-ray diffraction (XRD) patterns were recorded at room temperature using a Rigaku D/MAX 2000 PC diffractometer with Cu K $\alpha$  radiation ( $\lambda=1.5406\text{\AA}$ ). Scanning electron microscopy (SEM) images were obtained on a HITACHI S4800 microscope. Detailed structural properties of the obtained product were investigated by transmission electron microscopy (TEM, JEM-2010, JEOL).

### Electrochemical measurements

The electrochemical performance of the TiO<sub>2</sub> nanorods array on Cu substrate was studied by Swagelok-type two-electrode assembled in an Ar-filled glove box (MB-10-G with TP170b/mono, MBRAUN) using lithium foil as anode, 1M LiPF<sub>6</sub>/EC+DEC (1:1 in volume) as electrolyte, and Celgard 2300 membrane as separator. For these experiments, no additives such as binder agent and conductive agent were used. The galvanostatic charge/discharge cycle was performed using a battery test system (NEWARE BTS-610, Neware Technology Co., Ltd) at a constant current density, with cut off voltage of 2.6–1.0V (vs. Li/Li<sup>+</sup>). A three-electrode electrochemical cell was employed for cyclic voltammetry measurements in which Li metal disk served as the reference and counter electrodes. Cyclic voltammetric (CV) tests were conducted between 1.0-2.6V with scan rate of 0.1, 0.5 and 1.0 mV · s<sup>-1</sup> (IM6ex, Zahner elektrik).

**S1:** In order to confirm that the nanorods contain Ti and O without any chlorides, which probably influence the electrochemical test, energy-dispersive X-ray spectrometry (EDS) analysis is introduced. The peaks of Si, C and Cu are donated by the TEM equipment and copper grid, respectively.

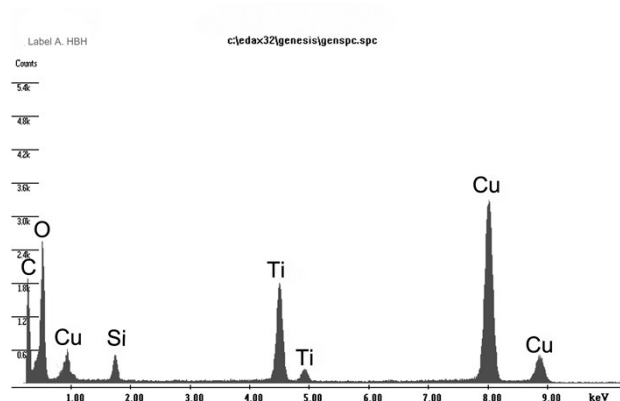

**Figure S1.** EDS result of the as-cleaned nanorods array

**S2:** Urea here plays an important role for the growth of nanorods. (1) Slow down the hydrolysis of  $\text{Ti}^{3+}$  and afford simultaneously hydrolysis–condensation by olation of the  $\text{Ti}^{3+}$ , which can control the nucleation progress.<sup>S1-S4</sup> (2) Tailoring the pH value of the reaction solution preventing the corrosion of Cu substrate by high concentration of  $\text{Cl}^-$ .

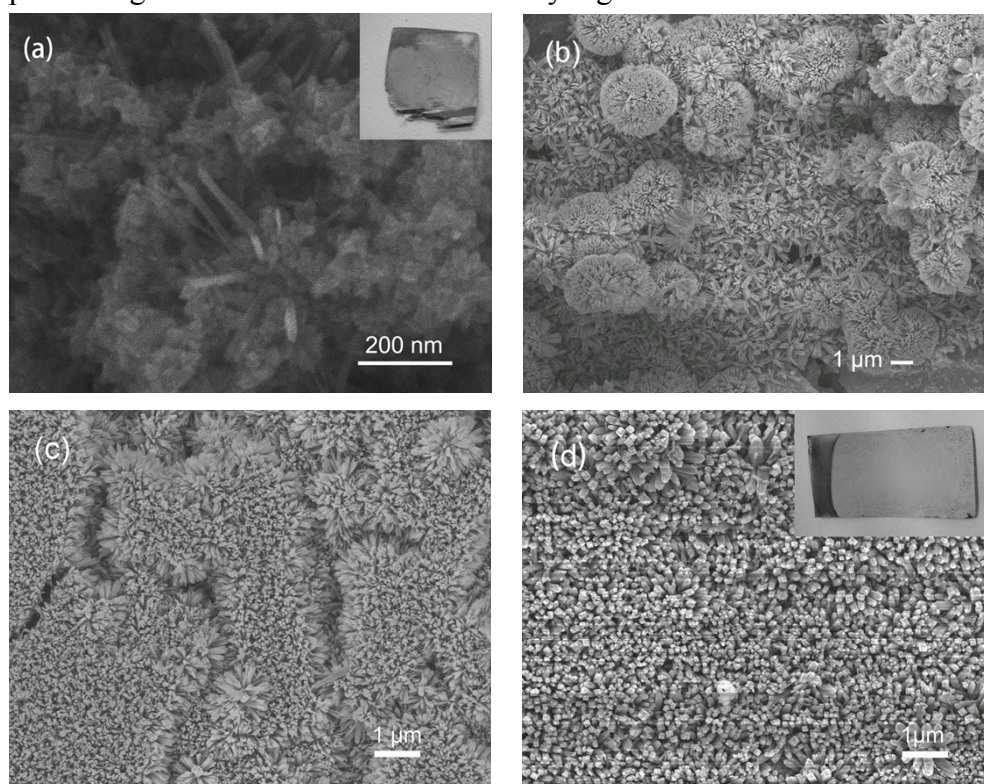

**Figure S2** SEM image of (a) sample prepared with absence of urea (b) sample prepared with addition of 0.05g urea, (c) sample prepared with addition of 0.1 g urea, and (d) sample prepared with addition of 0.3 g urea

It is well known that urea decomposes in hot water and produces ammonia and carbon dioxide. The reaction is as follows:

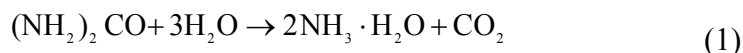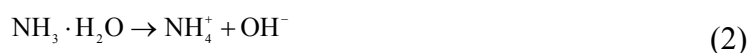

And the chemical process of the formation of  $\text{TiO}_2$  is:

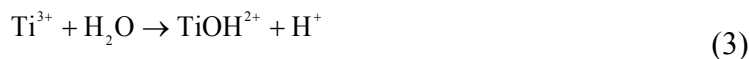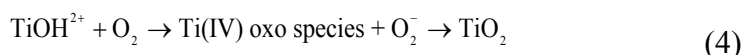

The hydrolysis of  $\text{Ti}^{3+}$  was slow down firstly because of the coordination between  $\text{Ti}^{3+}$  and ammonia ligands, resulting in the change of composition or coordination structure of the growing unit, and induced the heterogeneous nucleation on the Cu substrates.<sup>S1</sup> Then, with the slow generation of  $\text{OH}^-$ ,  $[\text{Ti}(\text{OH})_2(\text{Cl})_2(\text{OH}_2)_2]^0$  complex was formed,<sup>S2</sup> leading the growth of rutile  $\text{TiO}_2$  by oxolation (the formation of oxo bridges by the elimination of water).<sup>S3-S4</sup> Furthermore, it is widely known that copper can be corroded badly by  $\text{Cl}^-$ , especially with the presence of  $\text{H}^+$ , and the high pH value is benefit of preventing copper corrosion,<sup>S5-S7</sup> which was achieved by the hydrolysis of urea.

Figure S2a shows  $\text{TiO}_2$  nanoparticles are produced with observation of only a few nanorods in the absence of urea, and the copper substrate is badly corroded. With the addition of urea, dandelion-like structures assembled by nanorods generate (Figure S2b). As is shown of Figure S2d, uniform  $\text{TiO}_2$  nanorods array was prepared when the content of urea is up to 0.3g, and the corrosion of Cu substrate is prevented.

## Supporting References

(S1)Y. B. Zhang, X. J. Feng, L. Jiang, *Sci China Ser B-Chem.*, 2007, **50**, 175-178

(S2)Y. H. Jin, S. H. Lee, H. W. Shim, K. H. Ko, and D. W. Kim. *Electrochim. Acta*, 2010, **55**, 7315-7321

(S3)K. C. Song, Y. Kang, *Mater. Lett.*, 2000, **42**, 283-289.

(S4) L. Vayssieres, and M. Graetzel, *Angew. Chem. Int. Ed.*, **2004**, 43, 3666-3670.

(S5)A. D. Modestov, G. D. Zhou, H. H. Ge, B. H. Loo, *J. Electroanal. Chem.*, **1995**, 380, 63-

(S6) J. L. Lei, L. J. Li, S. M. Cai, S. T. Zhang, D. Li, and M. Z. Yang, *Acta Phys. -Chim. Sin.*, **2001**, 17, 1101-1111.

(S7) L. Nunez, E. Reguera, F. Corvo, E. Gonzalez, and C. Vazquez, *Corros. Sci.*, **2005**, 47, 461-484.
